# Supplementary material for: The molecular basis of pH sensing by the human fungal pathogen Candida albicans TOK potassium channel
Source: PubMed Central journal article supplement — iScience. 2024 Nov 22;27(12):111451. doi: 10.1016/j.isci.2024.111451 (PMC11667011; doi:10.1016/j.isci.2024.111451), 2024-11-22
Supplement: mmc1.pdf [file mmc1.pdf]

iScience, Volume 27

## Supplemental information

The molecular basis of pH sensing by the human  
fungal pathogen *Candida albicans*

TOK potassium channel

Rían W. Manville, Claire L. Illeck, Anthony Lewis, Zoe A. McCrossan, Steven A.N. Goldstein, and Geoffrey W. Abbott

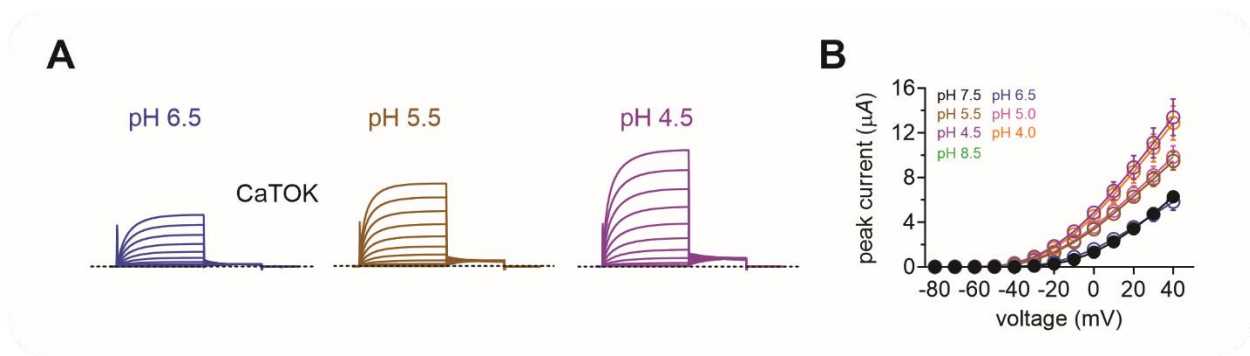

**Supplementary Figure 1. CaTOK channels are activated by extracellular acidification.**

- A. Averaged traces for CaTOK channels as indicated, expressed in oocytes in the presence of pH 8.5 – 4.0. Scale bar lower left;  $n = 8-26$  per group.
- B. Mean peak current (measured during prepulse) from traces as in A;  $n = 8-26$  per group.

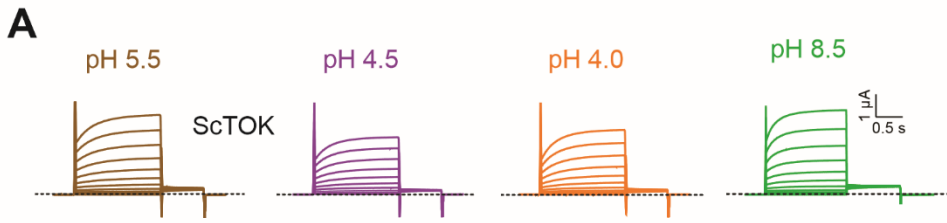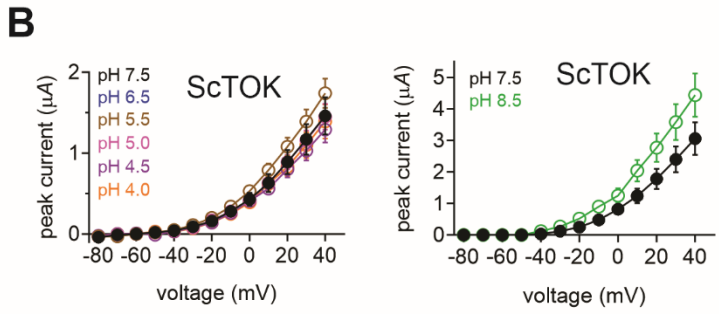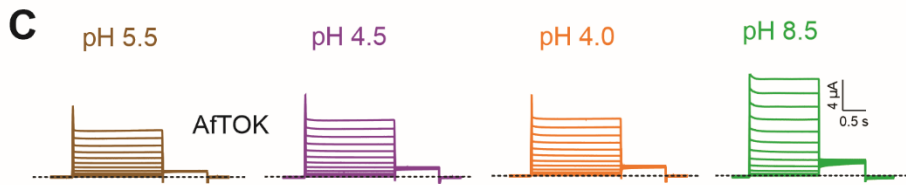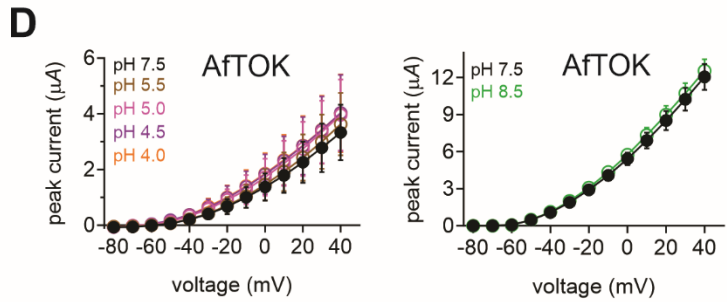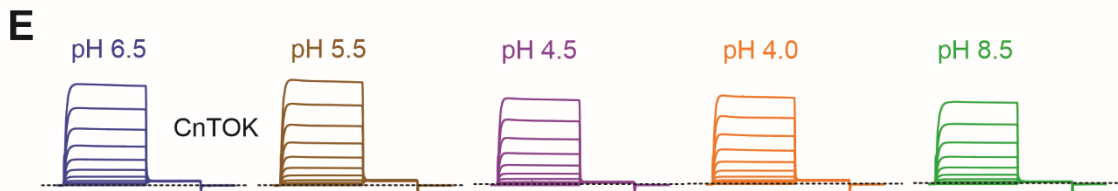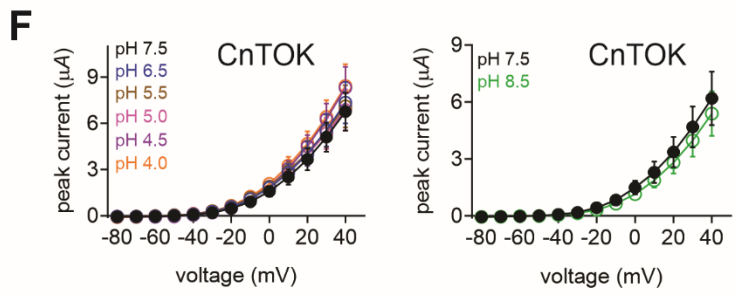

**Supplementary Figure 2. ScTOK, AfTOK, and CnTOK are all insensitive to extracellular pH.**

- A. Averaged traces for ScTOK channels as indicated, expressed in oocytes in the presence of pH 8.5 – 4.0. Scale bar upper right;  $n = 5-8$  per group.
- B. Mean peak current (measured during prepulse) from traces as in A;  $n = 5-8$  per group.
- C. Averaged traces for AfTOK channels as indicated, expressed in oocytes in the presence of pH 8.5 – 4.0. Scale bar upper right;  $n = 6-7$  per group.
- D. Mean peak current (measured during prepulse) from traces as in B;  $n = 6-7$  per group.
- E. Averaged traces for CnTOK channels as indicated, expressed in oocytes in the presence of pH 8.5 – 4.0. Scale bar upper right;  $n = 5-11$  per group.
- F. Mean peak current (measured during prepulse) from traces as in E;  $n = 5-11$  per group.

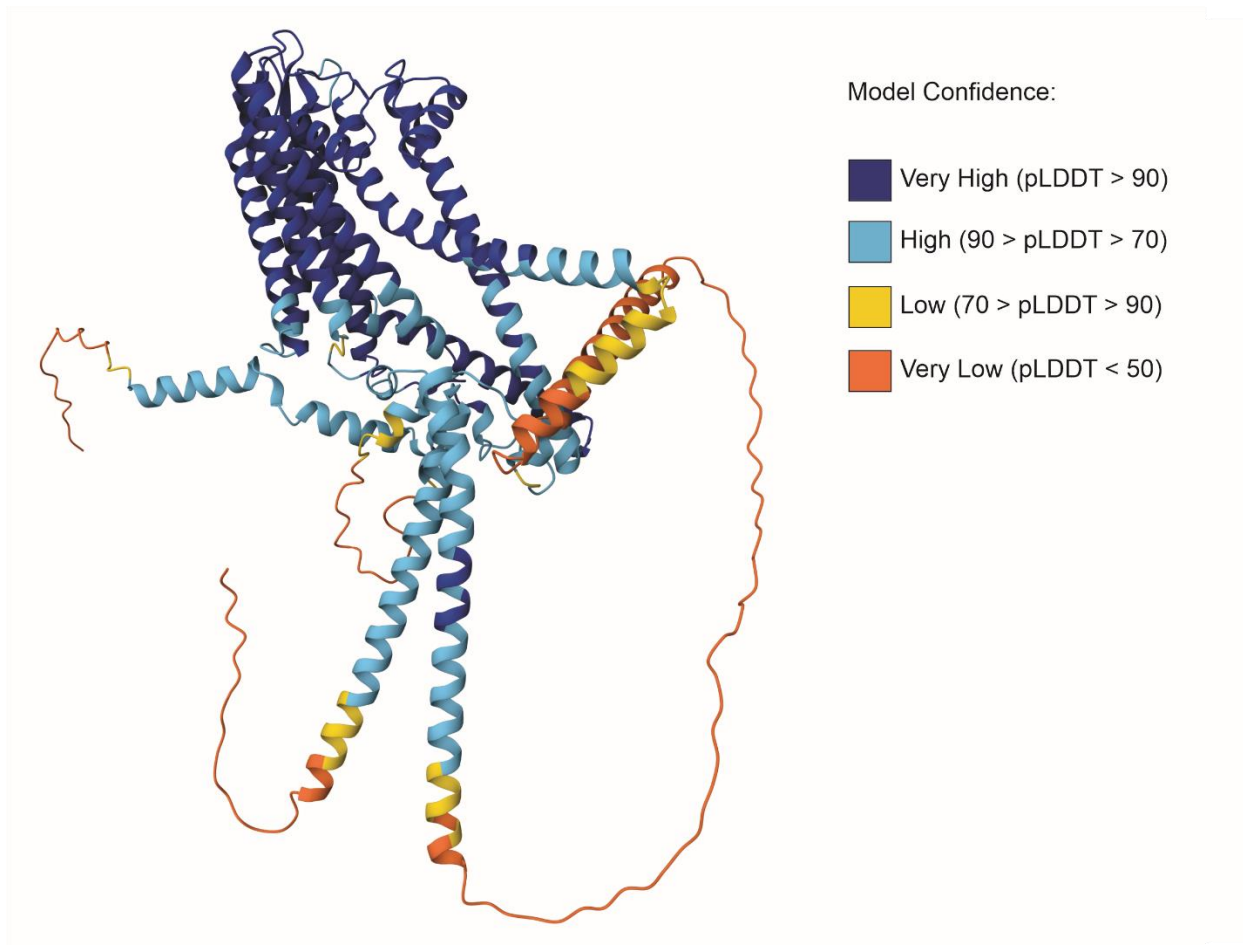

**Supplementary Figure 3. Predicted structure of CaTOK channel protein using AlphaFold. Key in the top left shows the per-residue model confidence score (pLDDT) between 0 and 100.**

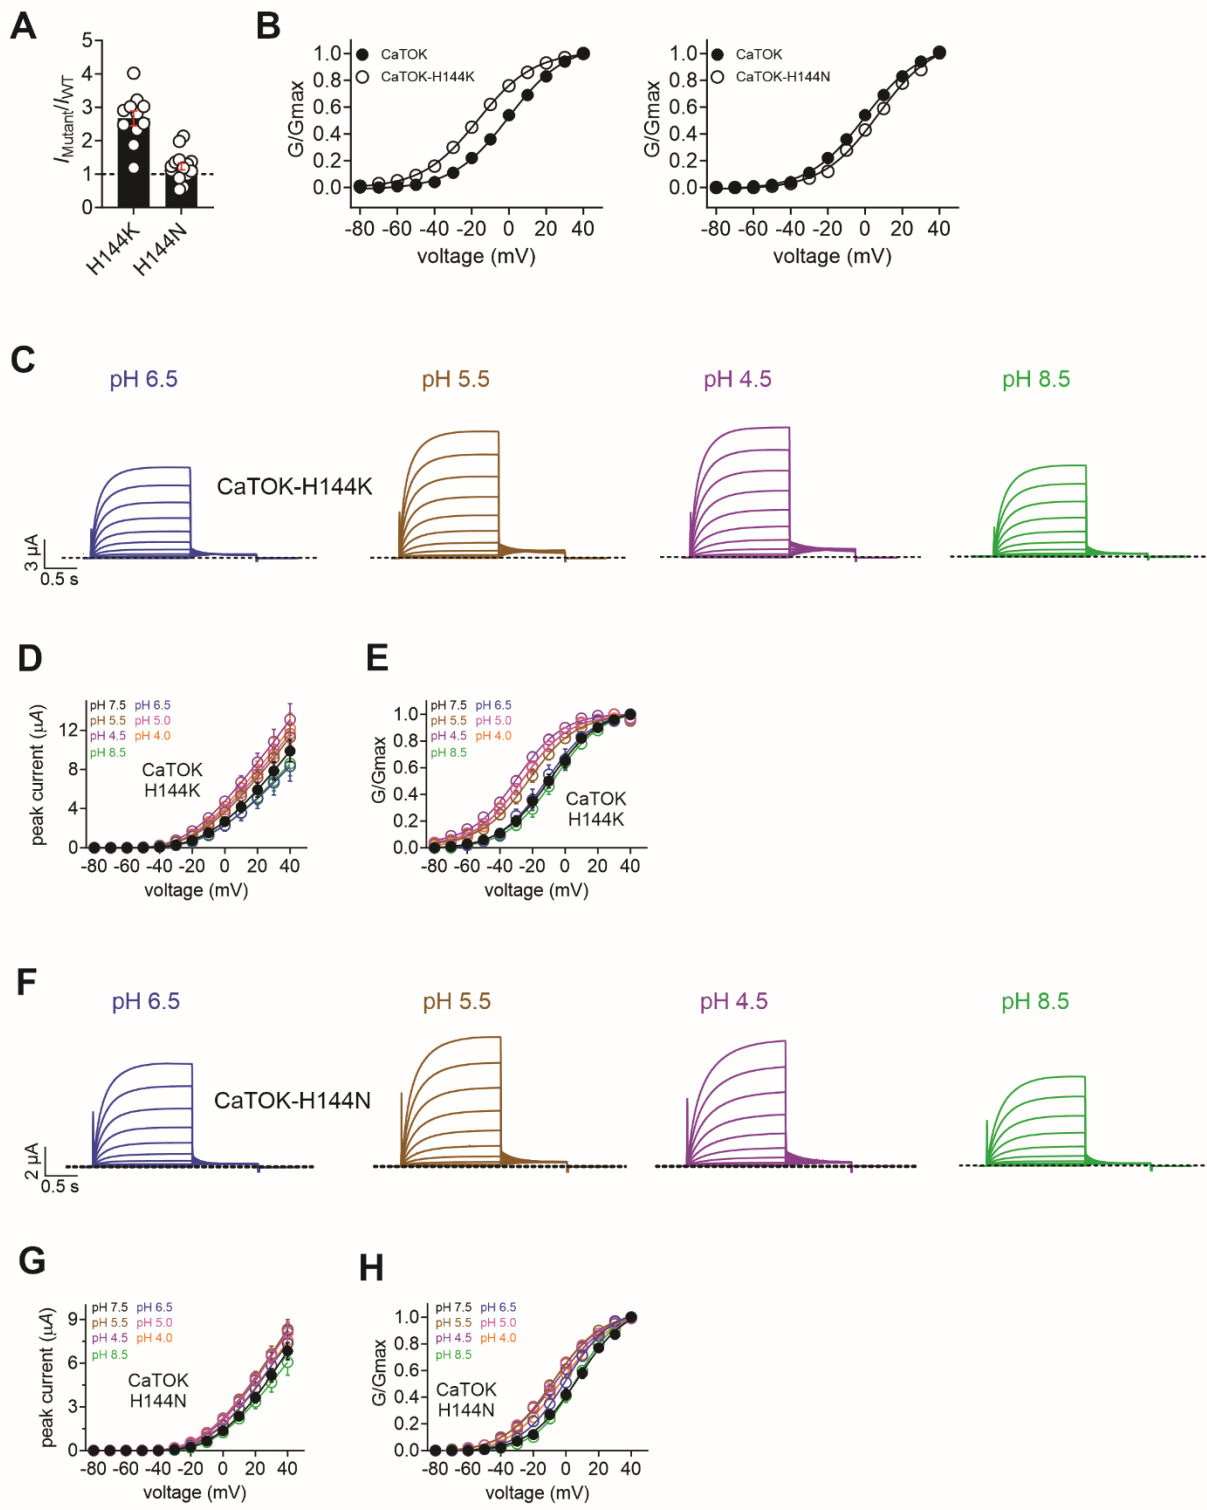

**Supplementary Figure 4. Protonation and deprotonation of H144 in the S1-S2 linker perturbs but does not abolish CaTOK pH sensitivity.**

- A. Current density at +40 mV for H144K and H144N normalized to wild type. Black dashed line indicates no change;  $n = 11-16$  per group.
- B. Mean normalized tail current (G/Gmax) for H144K (open circles; left) and H144N (open circles; right) versus wild type (filled circles);  $n = 11-16$  per group.
- C. Averaged traces for CaTOK-H144K channels as indicated, expressed in oocytes in the presence of pH 8.5 – 4.0. Scale bar lower left;  $n = 6-11$  per group.
- D. Mean peak current (measured during prepulse) from traces as in C;  $n = 6-11$  per group.
- E. Mean normalized tail current (G/Gmax) for traces as in C;  $n = 6-11$  per group.
- F. Averaged traces for CaTOK-H144N channels as indicated, expressed in oocytes in the presence of pH 8.5 – 4.0. Scale bar lower left;  $n = 8-16$  per group.
- G. Mean peak current (measured during prepulse) from traces as in F;  $n = 8-16$  per group.
- H. Mean normalized tail current (G/Gmax) for traces as in F;  $n = 8-16$  per group.

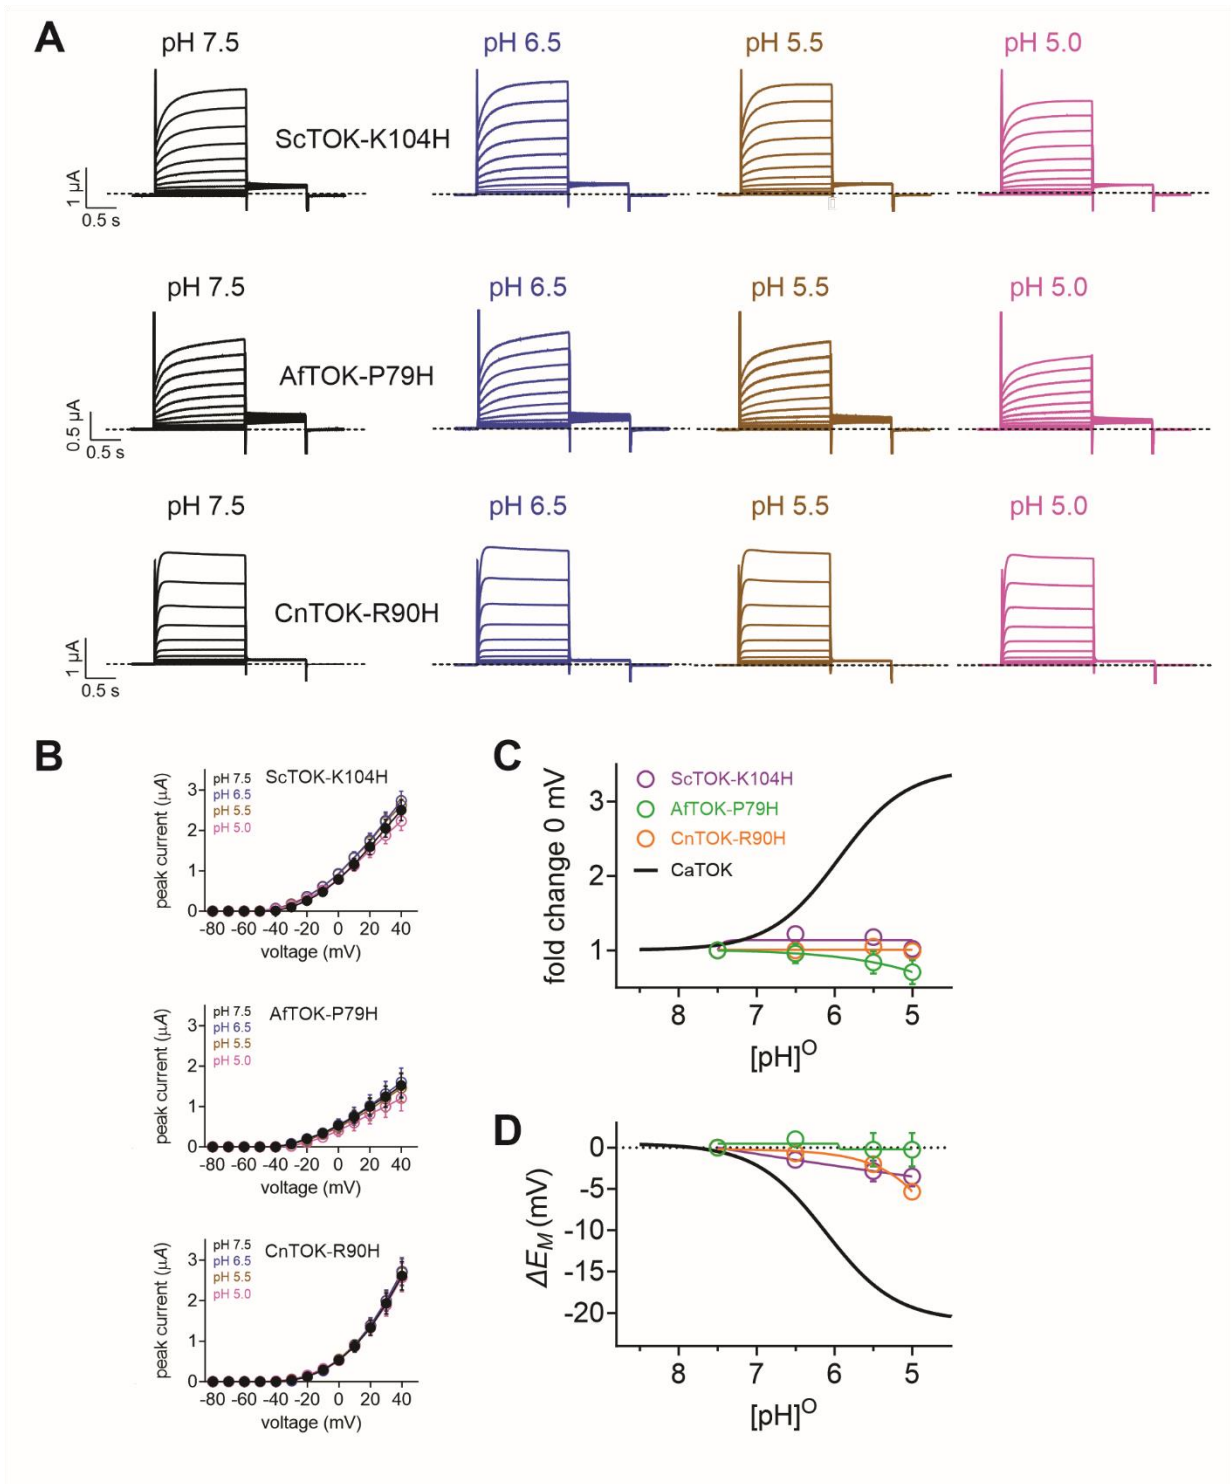

**Supplementary Figure 5. Introduction of a histidine alone cannot confer pH sensitivity to pH insensitive ScTOK, AfTOK, and CnTOK.**



- A. Averaged traces for ScTOK-K104H (Top), AfTOK-P79H (Middle), and CnTOK-R90H (Bottom) channels as indicated, expressed in oocytes in the presence of pH 8.5 – 4.0. Scale bar lower left;  $n = 4-7$  per group.
- B. Mean peak current (measured during prepulse) from traces as in A;  $n = 4-7$  per group.
- C. Mean current increase versus  $[\text{pH}]^{\circ}$  at 0 mV from traces as in A, with CaTOK data from Figure 1;  $n = 4-7$  per group.
- D. Mean  $E_M$  versus  $[\text{pH}]^{\circ}$  at 0 mV from traces as in A, CaTOK data from Figure 1;  $n = 4-7$  per group.

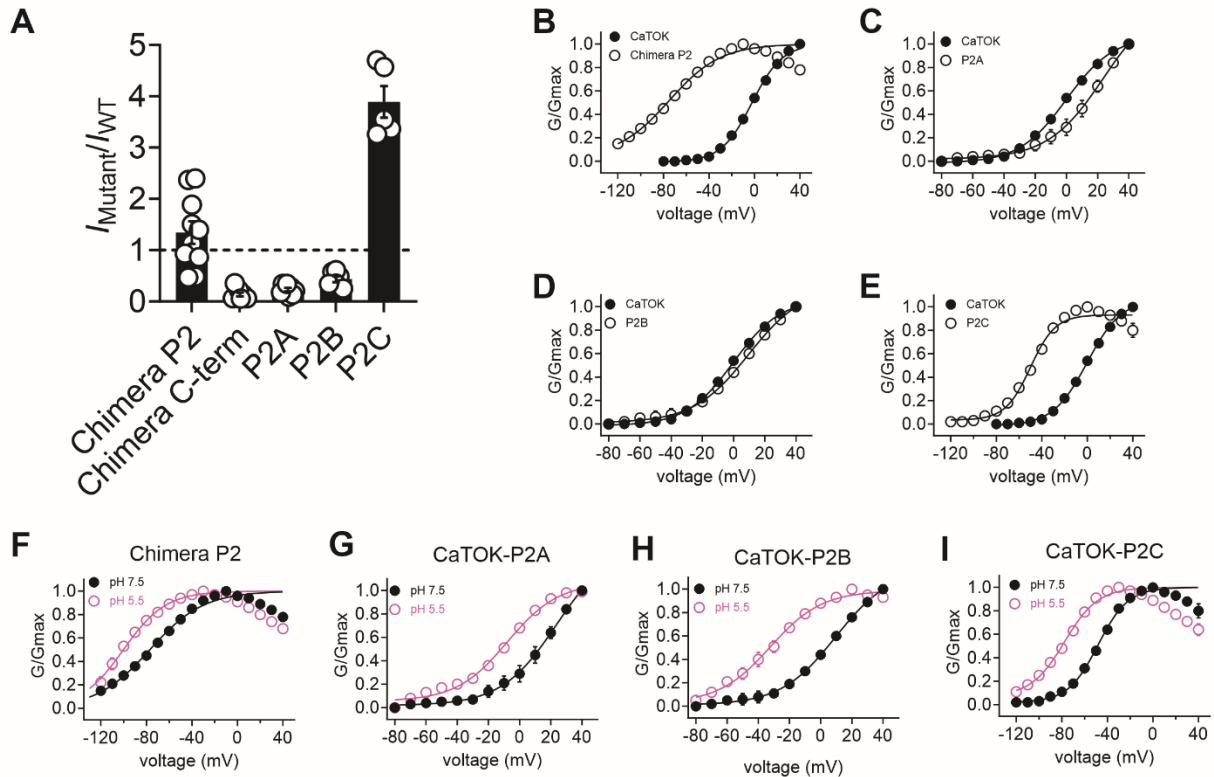

**Supplementary Figure 6. Current augmentation in response to extracellular acidification is conferred by the distal end of the second pore.**

- Current density at +40 mV for mutant chimeras and second pore domain cluster mutants normalized to wild type. Black dashed line indicates no change;  $n = 5-10$  per group.
- Mean normalized tail current ( $G/G_{\text{max}}$ ) for Chimera P2 (open circles) versus wild type (filled circles);  $n = 10$  per group.
- Mean normalized tail current ( $G/G_{\text{max}}$ ) for Chimera P2A (open circles) versus wild type (filled circles);  $n = 8$  per group.
- Mean normalized tail current ( $G/G_{\text{max}}$ ) for Chimera P2B (open circles) versus wild type (filled circles);  $n = 6$  per group.
- Mean normalized tail current ( $G/G_{\text{max}}$ ) for Chimera P2C (open circles) versus wild type (filled circles);  $n = 5$  per group.

- F. Mean normalized tail current ( $G/G_{\max}$ ) for chimera P2 mutant in the presence and absence of pH 5.5;  $n = 10$  per group.
- G. Mean normalized tail current ( $G/G_{\max}$ ) for P2A cluster mutant in the presence and absence of pH 5.5;  $n = 8$  per group.
- H. Mean normalized tail current ( $G/G_{\max}$ ) for P2B cluster mutant in the presence and absence of pH 5.5;  $n = 6$  per group.
- I. Mean normalized tail current ( $G/G_{\max}$ ) for P2C cluster mutant in the presence and absence of pH 5.5;  $n = 5$  per group.

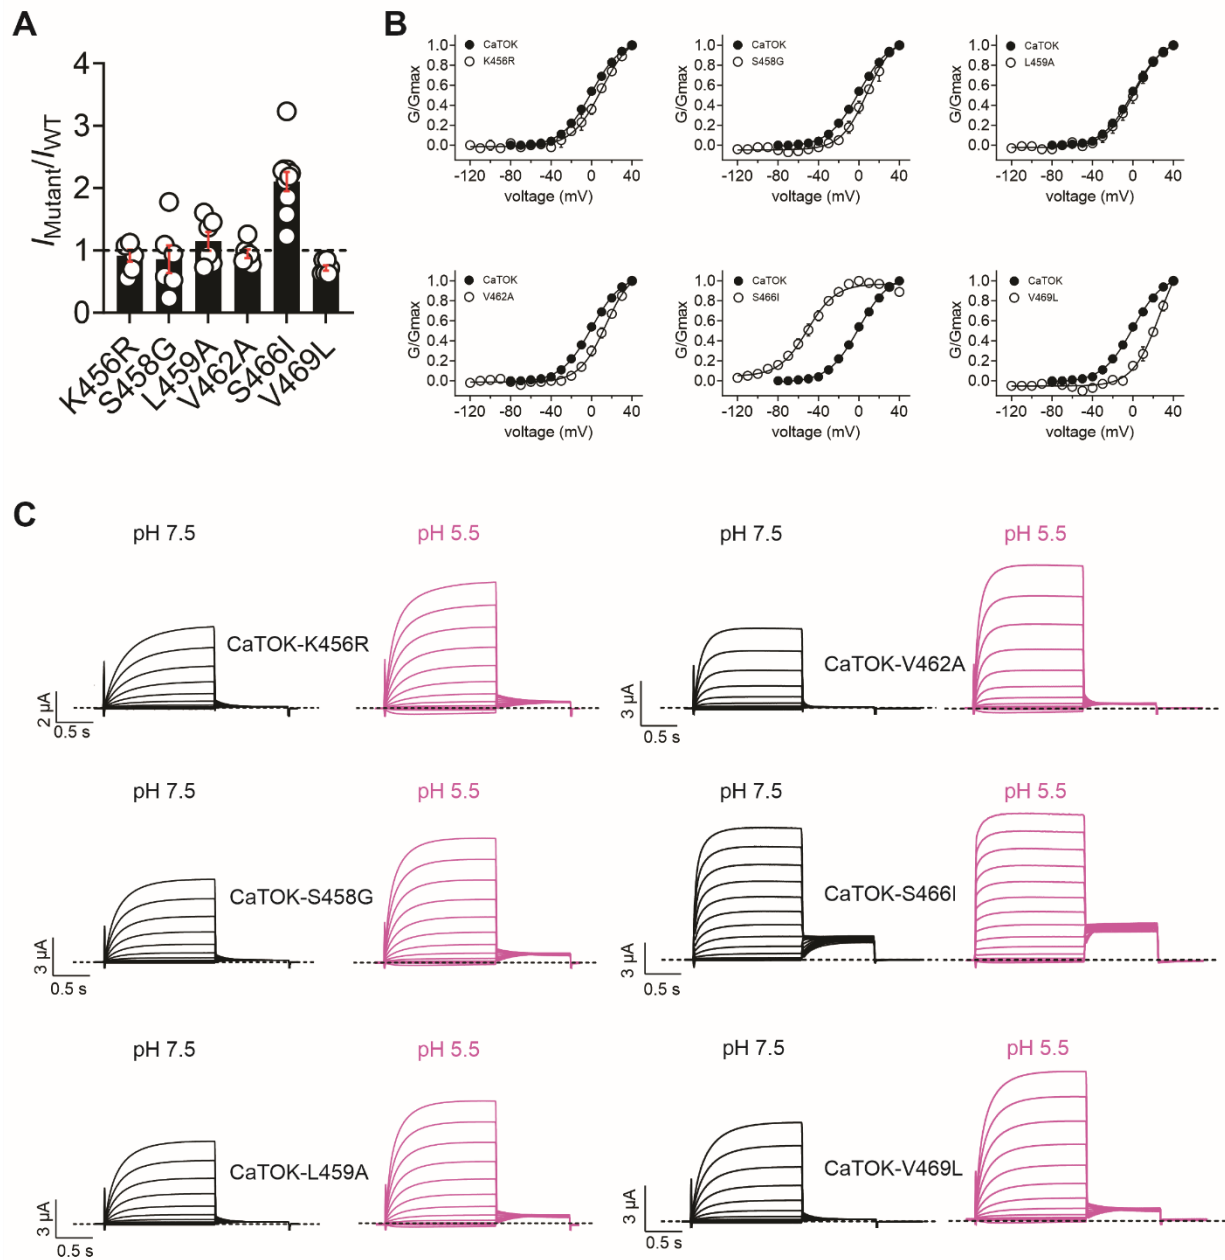

**Supplementary Figure 7. V462 and S466 in the proximal cap of S8 form part of the pH sensor for CaTOK.**

A. Current density at +40 mV for P2C single point mutants normalized to wild type. Black dashed line indicates no change;  $n = 6-11$  per group.

- B. Mean normalized tail current ( $G/G_{\max}$ ) P2C single point mutants (open circles) versus wild type (filled circles);  $n = 6-11$  per group.
- C. Averaged traces for K456R, S458G, L459A, V462A, S466I, and V469L channels as indicated, expressed in oocytes in the absence and presence of pH 5.5. Scale bar lower left;  $n = 6-11$  per group.

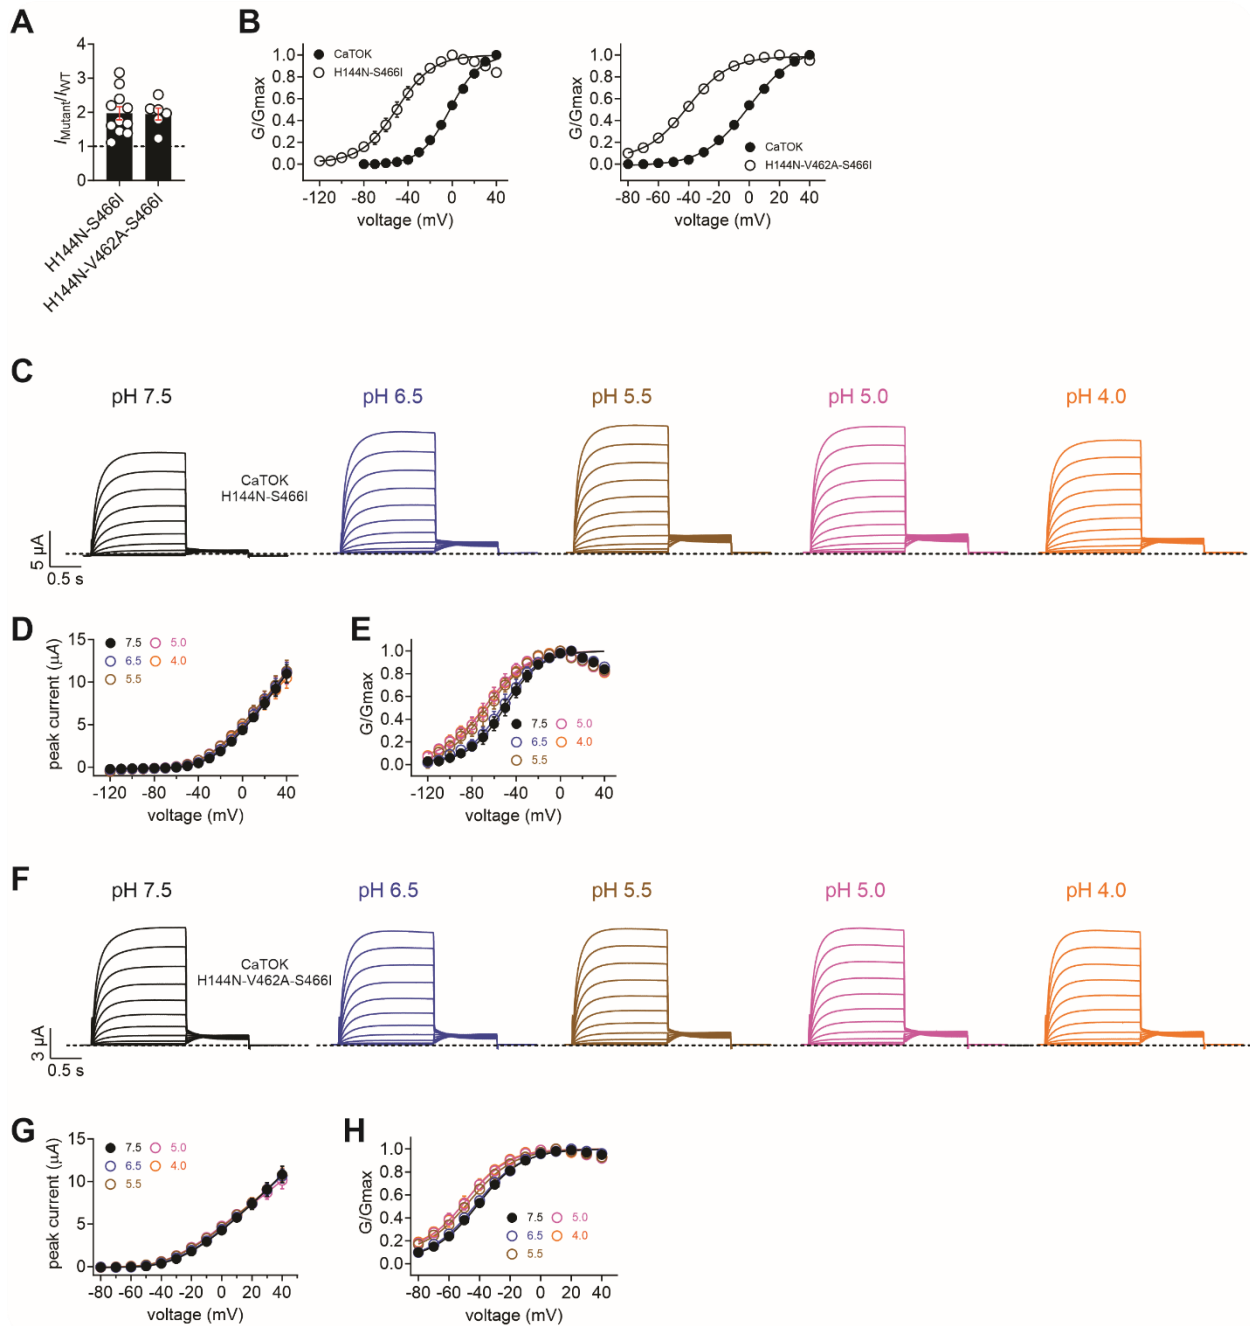

**Supplementary Figure 8. CaTOK-H144N-V462-S466I mutant abolishes pH sensitivity.**

A. Current density at +40 mV for H144N-S466I and H144N-V462A-S466I mutants normalized to wild type. Black dashed line indicates no change;  $n = 5-11$  per group.

- B. Mean normalized tail current ( $G/G_{max}$ ) for H144N-S466I (open circles; left) and H144N-V462A-S466I (open circles; right) versus wild type (filled circles);  $n = 5-11$  per group.
- C. Exemplar traces for H144N-S466I channels as indicated, expressed in oocytes in the presence of pH 7.6 – 4.0. Scale bar lower left;  $n = 11$  per group.
- D. Mean peak current (measured during prepulse) from traces as in C;  $n = 11$  per group.
- E. Mean normalized tail current ( $G/G_{max}$ ) for traces as in C;  $n = 11$  per group.
- F. Exemplar traces for H144N-V462A-S466I channels as indicated, expressed in oocytes in the presence of pH 7.6 – 4.0. Scale bar lower left;  $n = 5-6$  per group.
- G. Mean peak current (measured during prepulse) from traces as in F;  $n = 5-6$  per group.
- H. Mean normalized tail current ( $G/G_{max}$ ) for traces as in F;  $n = 5-6$  per group.
